# Supplementary material
Source: PubMed Central journal article supplement (PMC3249089)
Supplement: supp_M111.311340_jbc.M111.311340-1.pdf [file supp_M111.311340_jbc.M111.311340-1.pdf]

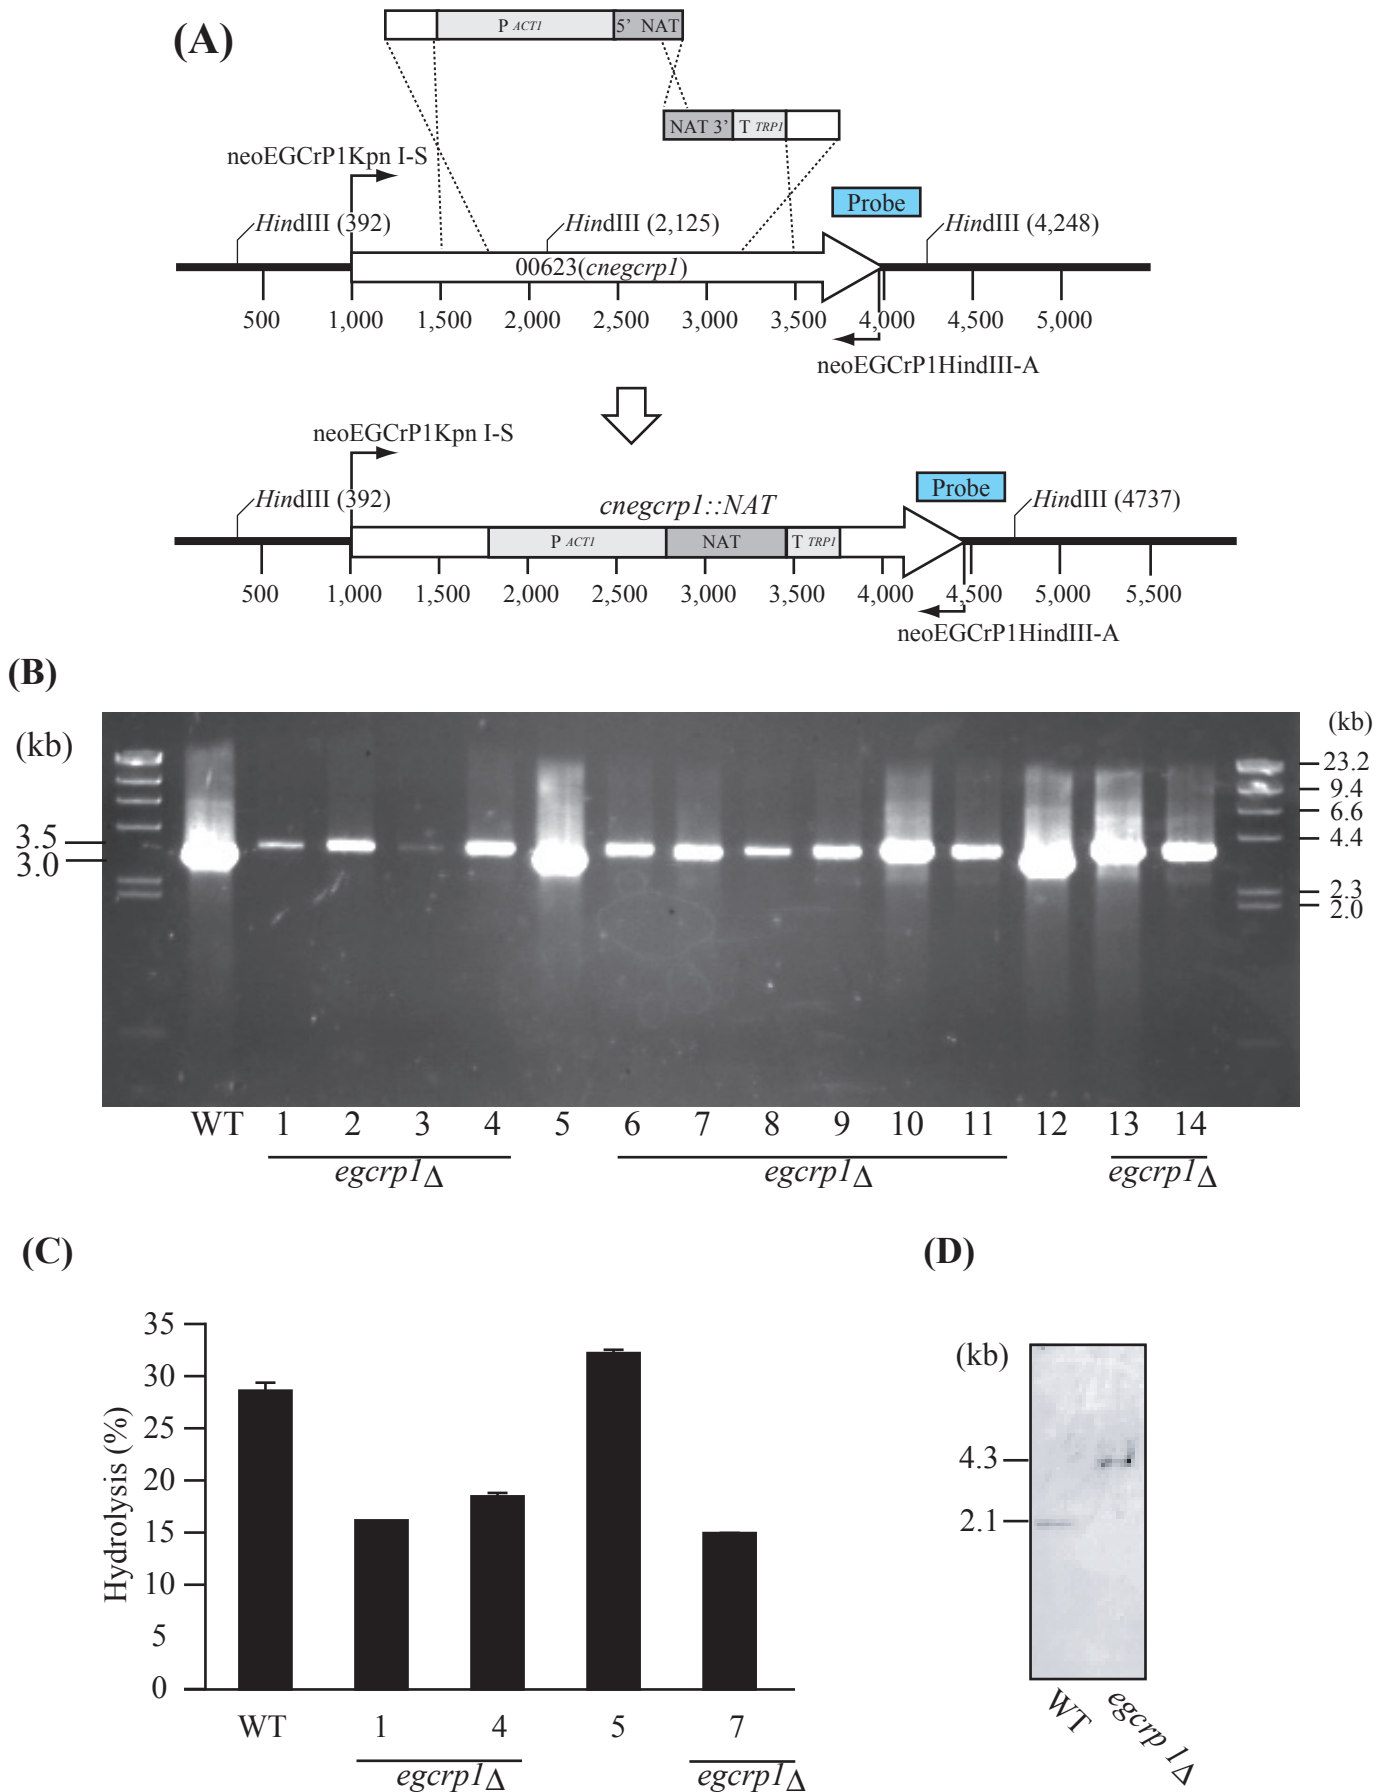

**FIGURE S1. Disruption of *egcrp1* by the split marker method in *Cryptococcus neoformans*.** (A), strategy for disruption of *C. neoformans egcrp1* (*cnegcrp1*) by the split marker method. (B), *egcrp1* amplified by PCR using primers described in (A) to select *egcrp1* $\Delta$  strains. (C), hydrolysis of C6-NBD-GlcCer at pH 7.3 by cell lysate prepared from wildtype and *egcrp1* $\Delta$  strains. (D), Southern blot analysis of *HindIII* digested-genomic DNA extracted from wildtype and *egcrp1* $\Delta$  strains.
