# Supplementary material
Source: PubMed Central journal article supplement (PMC3249089)
Supplement: supp_M111.311340_jbc.M111.311340-2.pdf [file supp_M111.311340_jbc.M111.311340-2.pdf]

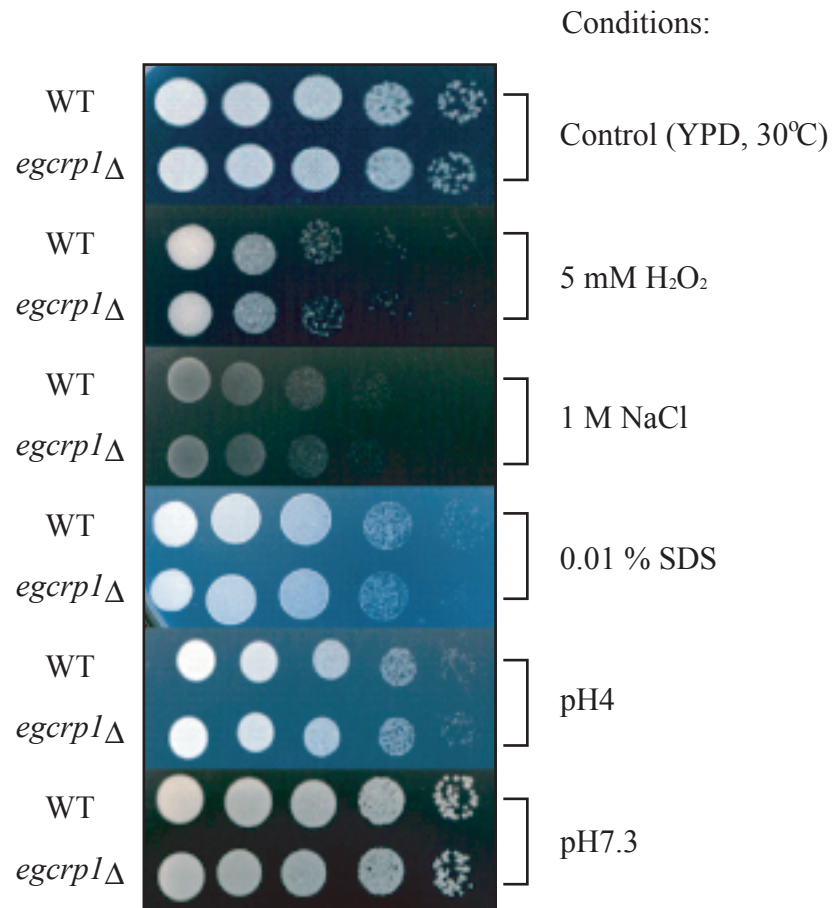

**FIGURE S2. Phenotype analysis of *egcrp1*Δ cells of *C. neoformans*.**

Stress sensitivity of wildtype (WT) and *egcrp1*Δ strains was tested as described in EXPERIMENTAL PROCEDURES. Each strain was serially diluted and spotted onto agar medium.
