# Supplementary material
Source: PubMed Central journal article supplement (PMC3249089)
Supplement: supp_M111.311340_jbc.M111.311340-3.pdf [file supp_M111.311340_jbc.M111.311340-3.pdf]

Table S1. Oligonucleotide primers used in this study. Restriction enzyme sites are underlined.

| Genus and species    | Gene locus   | Aim             | Oligonucleotide   | Sequence                                        |
|----------------------|--------------|-----------------|-------------------|-------------------------------------------------|
| <i>R. oryzae</i>     | RO3G_04172   | Expression      | roEGCrP1BamHI-S   | <u>CCCGGATCC</u> ATGACTCATCCCGACCGATCCGC        |
|                      |              |                 | roEGCrP1XhoI-A    | CCCC <u>CTCGAGT</u> TACATGACACTGCATGAATTGGC     |
|                      |              |                 | roEGCrP1HindIII-A | CCCC <u>AAGCTT</u> TACATGACACTGCATGAATTGGC      |
|                      |              | Mutation        | E254Q-S           | ATGAACCAACCTCATCCGGTTATATT                      |
|                      |              |                 | E254Q-A           | ATGAGGTTGGTTCATGAACTCAAAGGC                     |
|                      |              |                 | E483Q-S           | ATGGGTCAGGTAGGTATCCCGATGGAT                     |
|                      |              |                 | E483Q-A           | CTGACCCATTATACAAGGTTTTCTCTCC                    |
| <i>C. neoformans</i> | CNAG_00623   | Expression      | cnEGCrP1KpnI-S    | <u>GGCCGGTACC</u> ATGTCGGTATTTCAGTTCGACG-       |
|                      |              |                 | cnEGCrP1Xba-A     | GGCC <u>TCTAGA</u> CTACATTCCATTGGCCTCCC         |
|                      |              | Gene disruption | CN00623N-U        | GAAGATTATCTTGGCTACTTG                           |
|                      |              |                 | CN00623-AP-D      | CGCAGCCTGGACAATAGCGAGTCATAGCCCCCTT<br>TCACCTGCG |
|                      |              |                 | ActinP-U          | ACTCGTATTGTCCAGGCTGC                            |
|                      |              |                 | Act-Nat-D         | GACTTCTTCTCCATAGACATGTTGGGCGAG                  |
|                      |              |                 | Nat-U             | ATGGAAGAAGAAGTCACTCTTGACGACACGGCT<br>TACC       |
|                      |              |                 | Nat-Ttrp-D        | TAAACCCCTTACCCTTGGGGCAGGGCATGCTC<br>AT          |
|                      |              |                 | NSL-2             | AAGGTGTTCCCGACGACGAATCG                         |
|                      |              |                 | NSR-2             | AACTCCGTCGCGAGCCCATCAAC                         |
|                      |              |                 | Ttrp-U            | AAGGCGTAAGGGGTTAATTTCTTAGAGGGTG                 |
|                      |              |                 | Ttrp-CN00623C-D   | GTTCTAAAGGCTTCTCATGCGACAGAAGAG<br>AAATGGTG      |
|                      |              |                 | CN00623C-U        | CAATGAGGAAGCCTTTAGAAC                           |
|                      |              |                 | CN00623C-D        | AACAATAACATTCAACAGACG                           |
| <i>A. fumigatus</i>  | AFUA_3G08820 | Expression      | afEGCrP1XhoI-S    | <u>CCGGCTCGAG</u> ATGGGTGTGCTACGGCTTAGA         |
|                      |              |                 | afEGCrP1EcoRI-A   | GGCCGAAT <u>TCT</u> CATCACACTGCATCCGC           |
